# Supplementary material for: Optimizing Bi active sites by Ce doping for boosting formate production in a wide potential window
Source: Royal Society of Chemistry journal article supplement (doi:10.1039/d3qi01769a), 2023-12-11
Supplement: d3qi01769a1.pdf [file d3qi01769a1.pdf]

## **Optimizing Bi Active Sites by Ce Doping for Boosting Formate-Production in A Wide Potential Window**

Yi-Cheng Wang<sup>1</sup>, Peng-Fei Sui<sup>1</sup>, Chenyu Xu<sup>2</sup>, Meng-Nan Zhu<sup>1</sup>, Renfei Feng<sup>3</sup>, Hongtao Ma,<sup>1</sup>  
Hongbo Zeng,<sup>1</sup> Xiaolei Wang<sup>1,\*</sup>, Jing-Li Luo<sup>1,4,\*</sup>

<sup>1</sup> Department of Chemical and Materials Engineering, University of Alberta, 9211-116 Street  
NW., Edmonton, Alberta T6G 1H9, Canada

<sup>2</sup> State Key Laboratory of Clean Energy Utilization, Zhejiang University, Hangzhou 310027,  
P.R. China

<sup>3</sup> Canadian Light Source Inc., 44 Innovation Boulevard, Saskatoon, Saskatchewan S7N 0X4,  
Canada

<sup>4</sup> Department of Materials Science and Engineering, Shenzhen University, Shenzhen 518060,  
P.R. China

Y. Wang and P. Sui contributed equally to this work.

Corresponding authors:

Xiaolei Wang, email: [xiaolei.wang@ualberta.ca](mailto:xiaolei.wang@ualberta.ca)

Jingli Luo, email: [jingli.luo@ualberta.ca](mailto:jingli.luo@ualberta.ca)

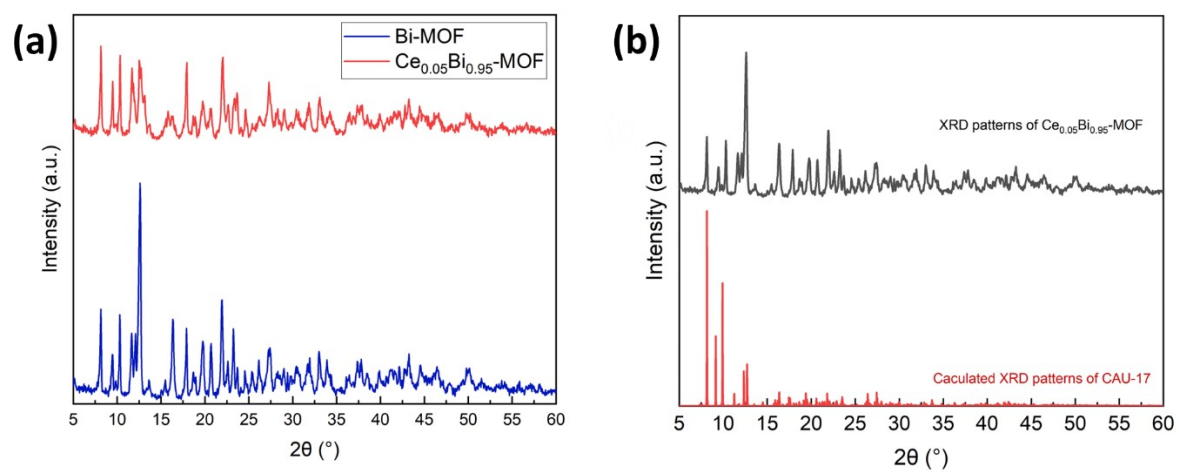

**Figure S1.** XRD patterns of Bi-MOF and  $\text{Ce}_{0.05}\text{Bi}_{0.95}\text{-MOF}$  precursor.

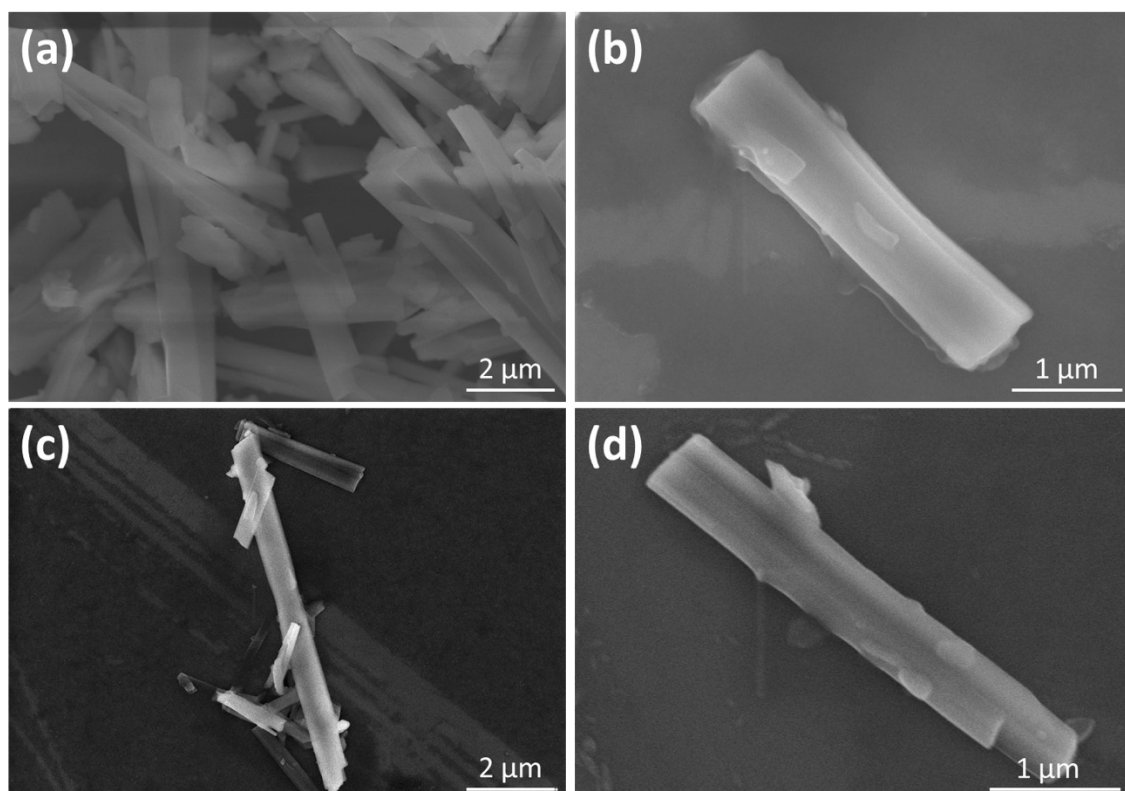

**Figure S2.** SEM patterns of (a,b) Bi-MOF NRs and (c,d) Ce<sub>0.05</sub>Bi<sub>0.95</sub>-MOF NRs.

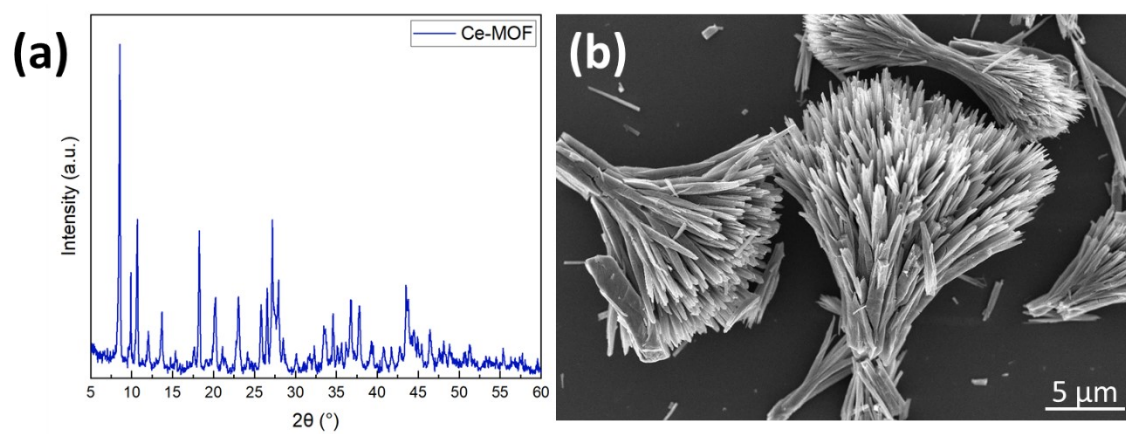

**Figure S3.** (a) XRD and (b) SEM patterns of Ce-MOF with broom-like structure.

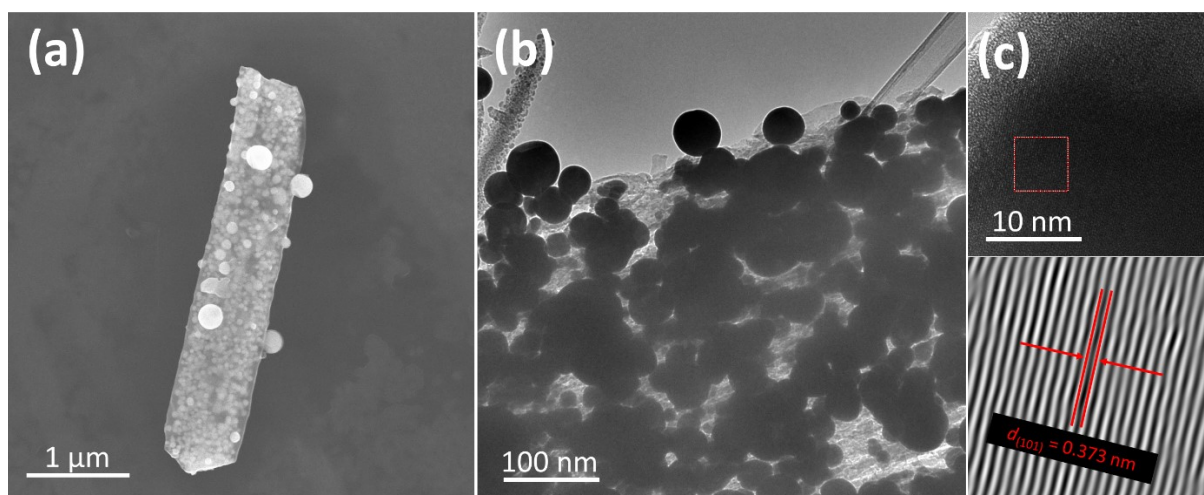

**Figure S4.** (a) SEM and (b,c) TEM patterns of Bi@C NRs.

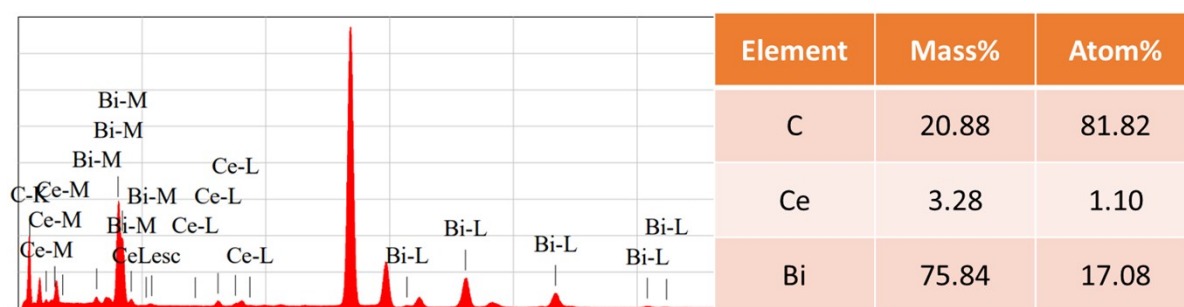

**Figure S5.** Elemental mapping of  $\text{Ce}_{0.05}\text{Bi}_{0.95}@C$  NRs.

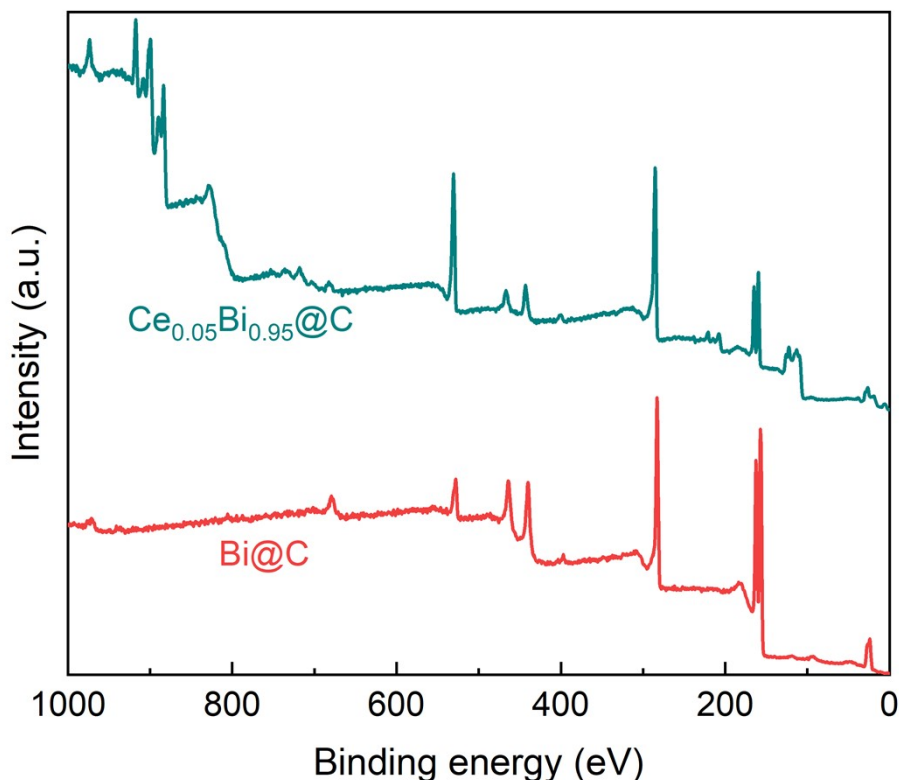

**Figure S6.** The full range XPS spectrum of Bi@C and Ce<sub>0.05</sub>Bi<sub>0.95</sub>@C NRs.

For the High-resolution XPS spectrum of Ce 3d of Ce<sub>0.05</sub>Bi<sub>0.95</sub>@C NRs, these peaks could be fitted into eight peaks that these four characteristic peaks (882.69 eV, 884.00 eV, 889.11 eV, and 898.73 eV) are ascribed to the Ce 3d<sub>5/2</sub> and those two characteristic peaks (901.19 eV, 902.12 eV, 907.43 eV, and 917.14 eV) are assigned to the Ce 3d<sub>3/2</sub>. Specifically, the pair of peaks at 884.00 eV and 902.12 eV corresponds to Ce<sup>3+</sup>, while the other peaks belong to Ce<sup>4+</sup>. Therefore, the hybrid of Ce<sup>3+</sup> and Ce<sup>4+</sup> were introduced on the surface of 5% Ce-doped Bi@C NRs.

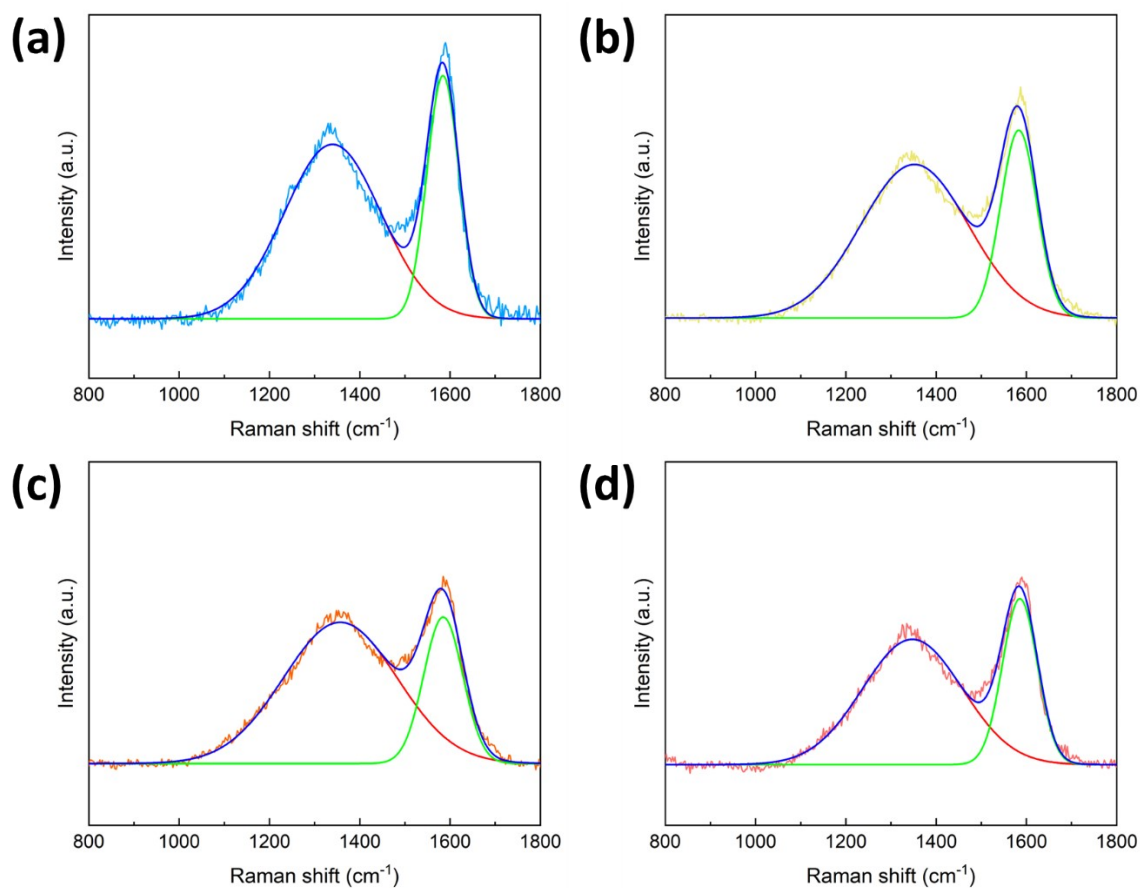

**Figure S7.** Raman spectra of (a) Bi@C NRs; (b) Ce<sub>0.01</sub>Bi<sub>0.99</sub>@C NRs; (c) Ce<sub>0.05</sub>Bi<sub>0.95</sub>@C NRs; (d) Ce<sub>0.1</sub>Bi<sub>0.9</sub>@C NRs.

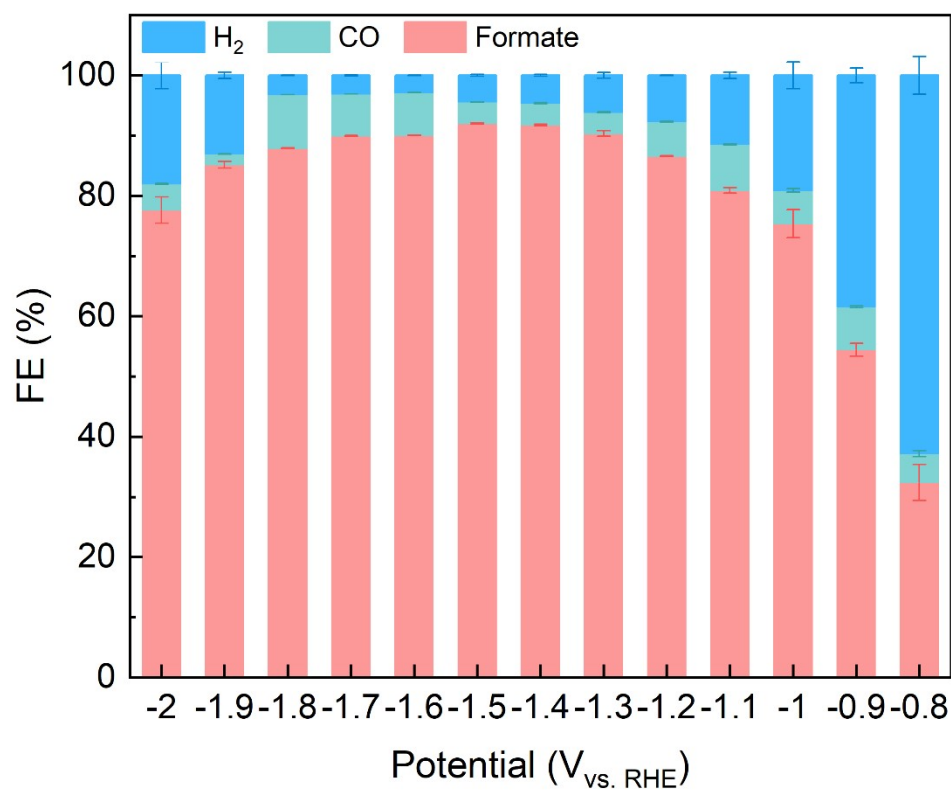

**Figure S8.** FEs of product distributions at different applied potentials on Bi@C.

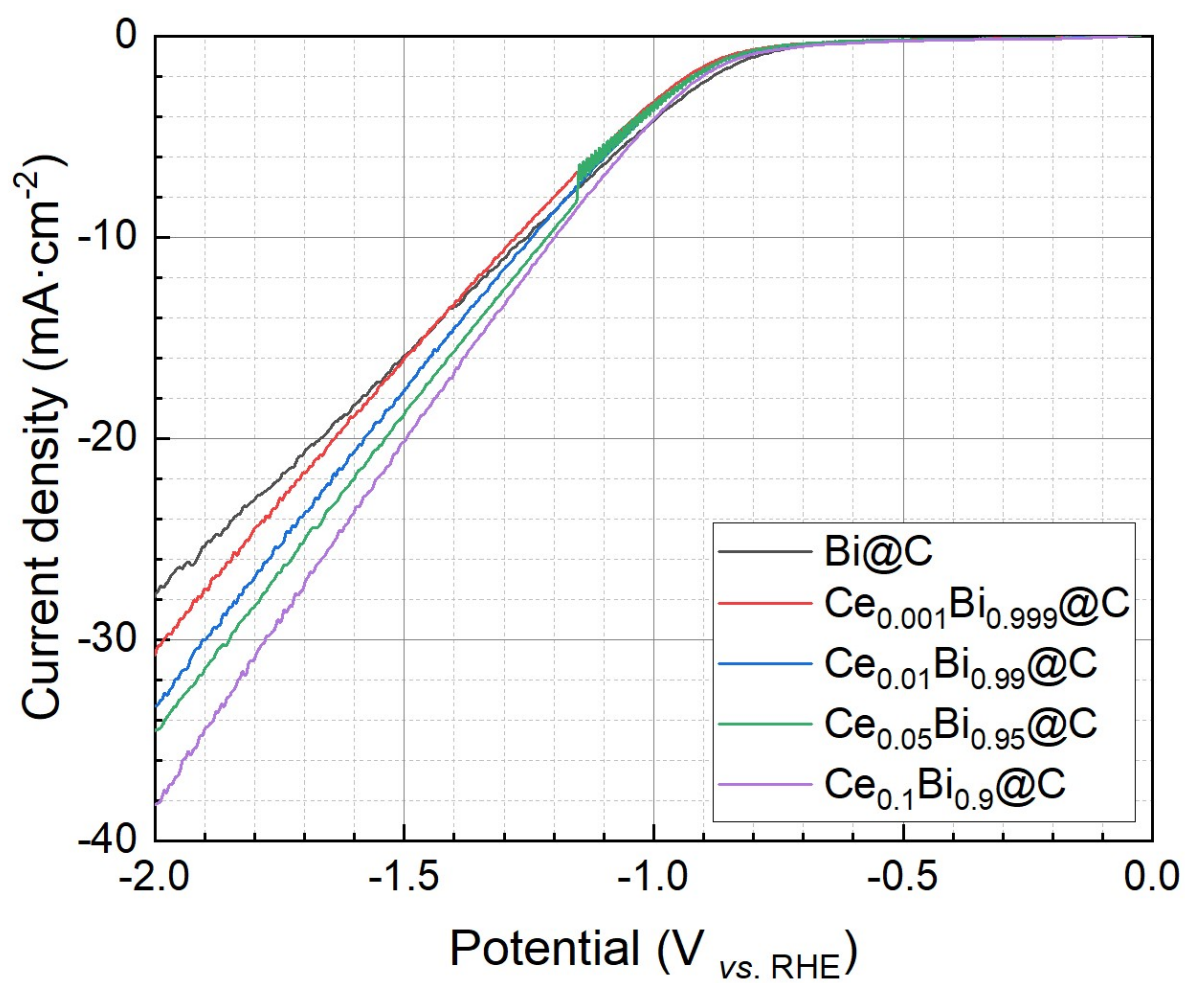

**Figure S9.** LSV curves of Bi@C NRs with different amounts of Ce doping in CO<sub>2</sub>-saturated 0.1 M KHCO<sub>3</sub>.

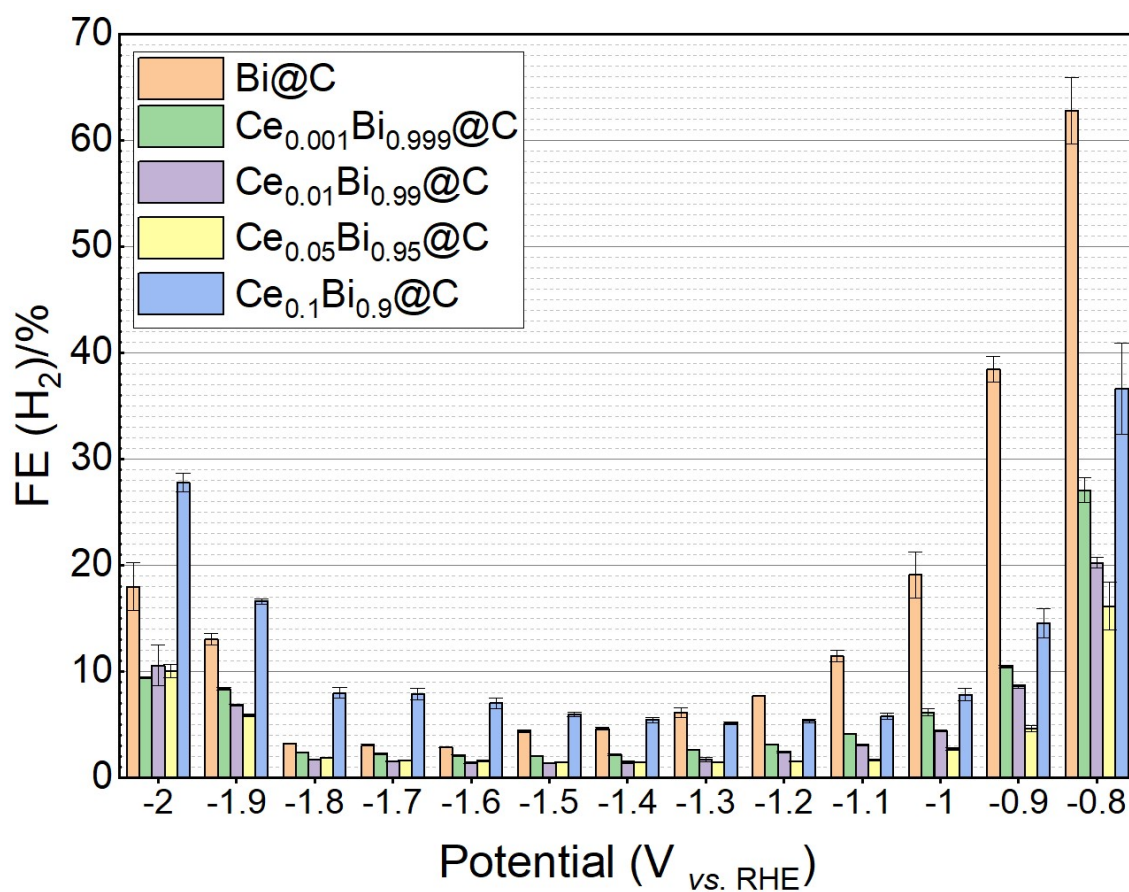

**Figure S10.**  $\text{Fe}_{\text{H}_2}$  of Bi@C NRs with different amounts of Ce doping at different applied potentials.

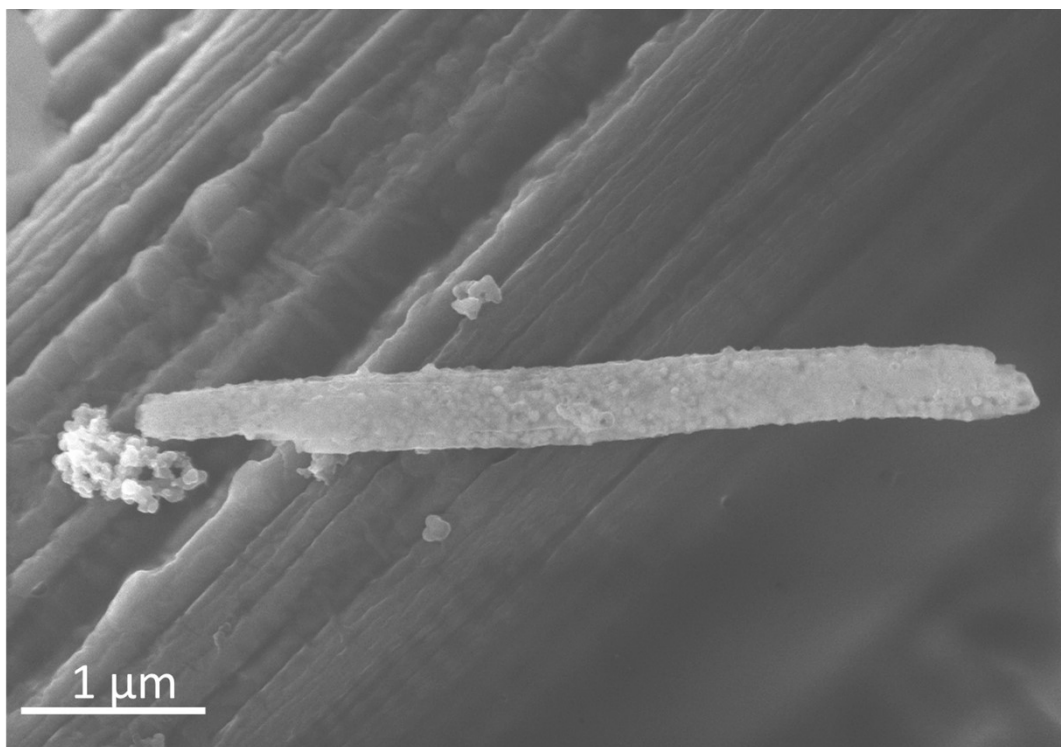

**Figure S11.** SEM image of Ce<sub>0.05</sub>Bi<sub>0.95</sub>@C NRs after stability test.

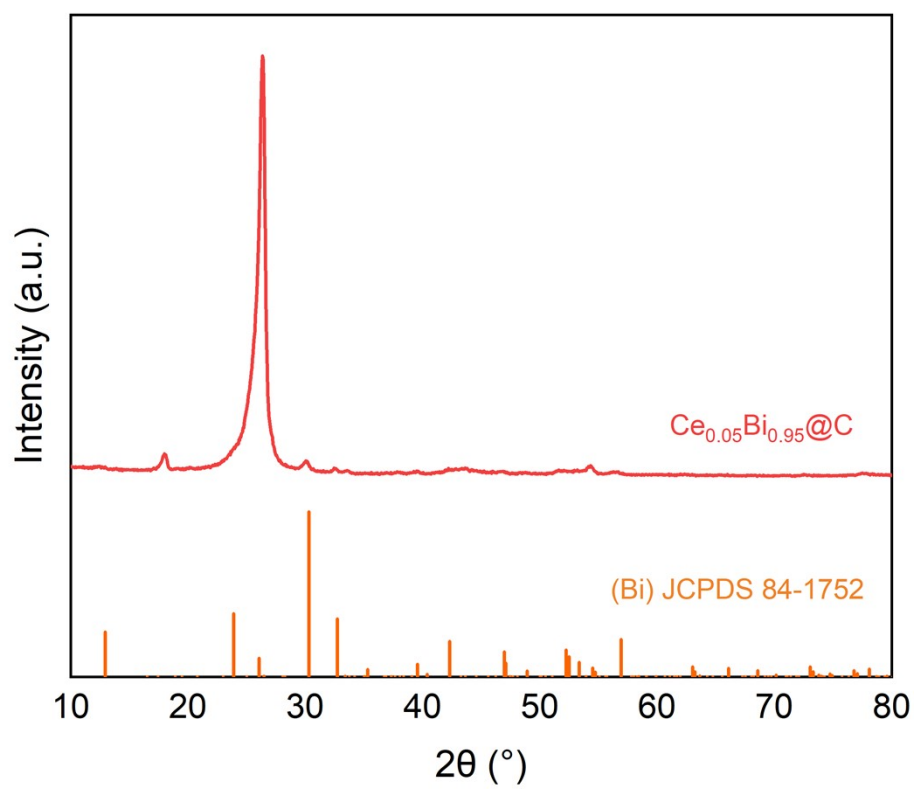

**Figure S12.** XRD pattern  $\text{Ce}_{0.05}\text{Bi}_{0.95}\text{@C}$  NRs after stability test.

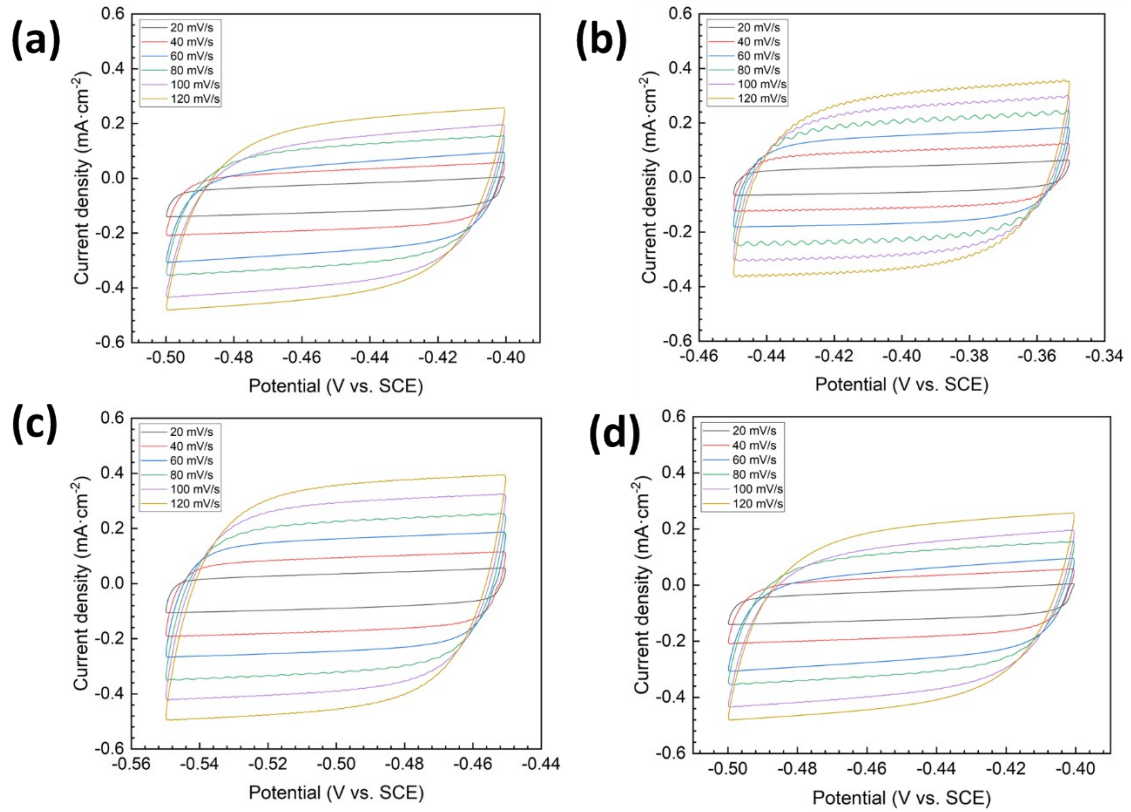

**Figure S13.** CV curves of Bi@C NRs with different amounts of Ce doping.

### Electrochemical active surface area (ECSA)

The ECSA of a material with similar composition is proportional to its electrochemical double-layer capacitance ( $C_{dl}$ ), which is measured by CV in a non-Faradaic region at different scan rates ( $V_s$ ) of 20, 40, 60, 80, 100, 120  $\text{mV s}^{-1}$ . Then the double-layer capacitance ( $C_{dl}$ ) was determined by plotting the  $\Delta j = (j_a - j_c)$  at -0.5 V vs. SCE as a function of the scan rate. It can be calculated through the following equation:

$$C_{dl} = \frac{d(\Delta j)}{2dV_s}$$

The ECSA can be calculated from the  $C_{dl}$  according to:

$$ECSA = \frac{C_{dl}}{C_s}$$

Where  $C_s$  is the specific capacitance of a flat surface with 1 cm<sup>2</sup> of real surface area. Here, the average double-layer capacitance of a smooth metal surface is assumed to be 20  $\mu\text{F cm}^{-2}$  [1]. The calculated value of ECSA for Bi@C NRs was about 10.19 cm<sup>2</sup>, while the value for 1%, 5%, and 10% Ce-doped Bi@C NRs were 11.49 cm<sup>2</sup>, 23.68 cm<sup>2</sup>, and 26.75 cm<sup>2</sup>, respectively. ECSA-corrected Tafel slopes for formate formation were calculated based on the corresponding ECSA-corrected formate partial current densities and overpotentials.

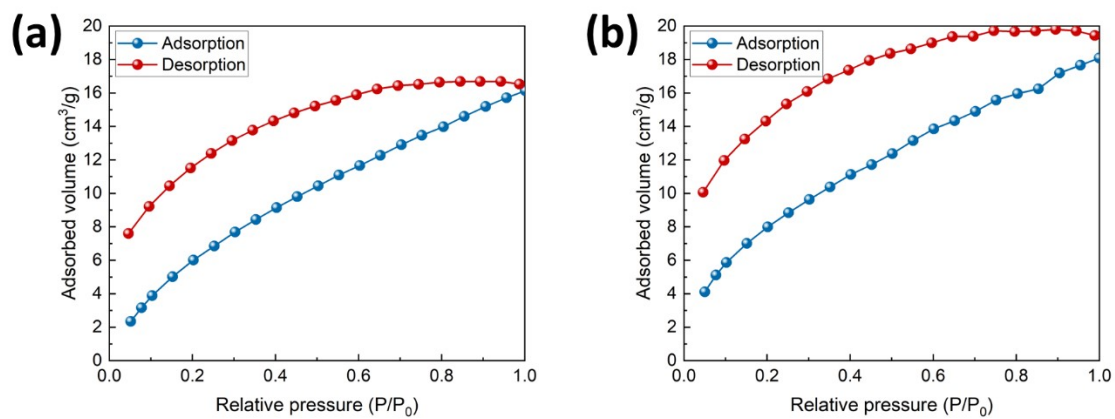

**Figure S14.** CO<sub>2</sub> adsorption isotherms of Bi@C NRs and Ce<sub>0.05</sub>Bi<sub>0.95</sub>@C NRs.

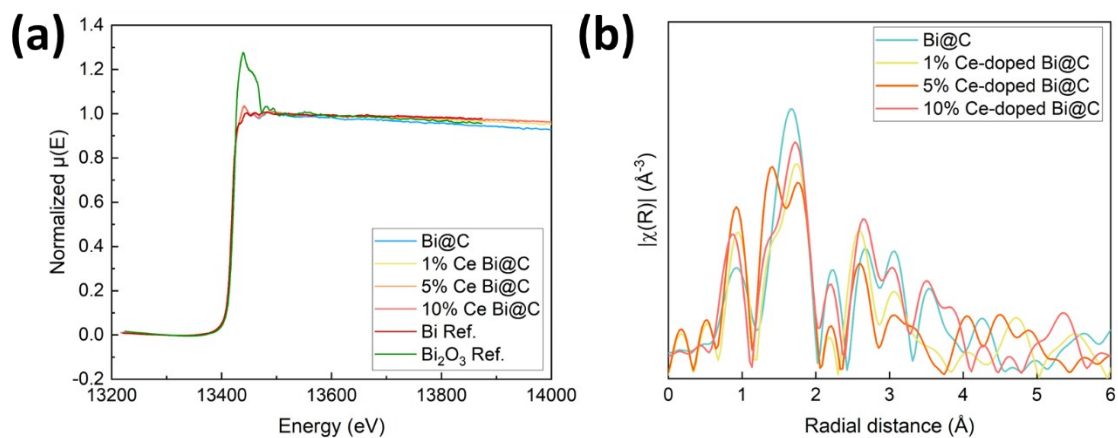

**Figure S15.** (a) XAS spectra of Bi@C and Ce-doped Bi@C NRs; (b) Fourier transforms of  $k^2$ -weighted EXAFS spectra to the  $R$  space of Bi@C and Ce-doped Bi@C NRs.

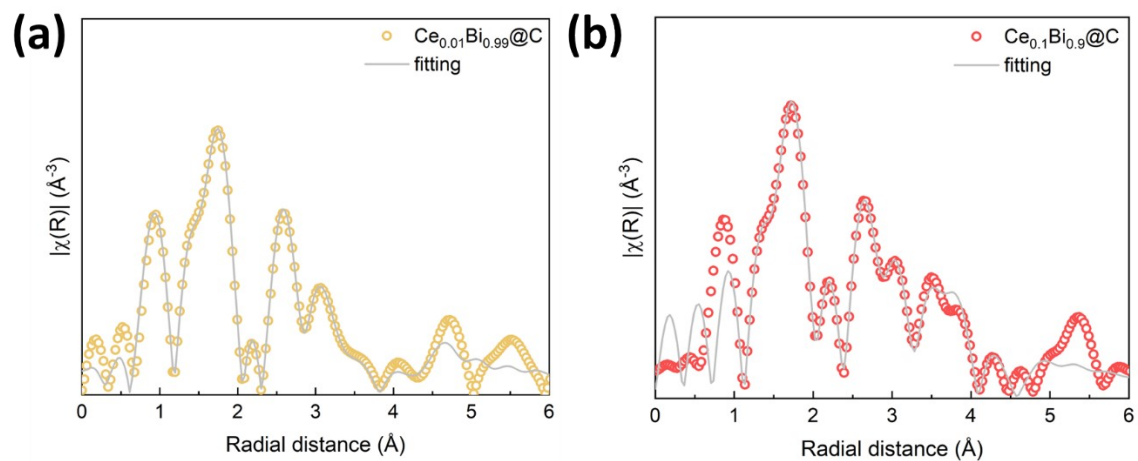

**Figure S16.** Representative fitting of the EXAFS spectra to the R-space of (a)  $\text{Ce}_{0.01}\text{Bi}_{0.99}@C$  NRs; (b)  $\text{Ce}_{0.1}\text{Bi}_{0.9}@C$  NRs.

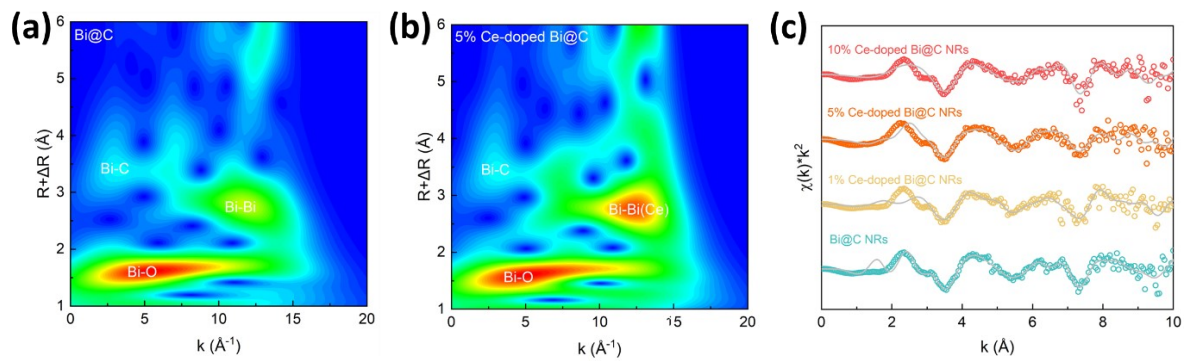

**Figure S17.** Morlet wavelet transform of EXAFS spectra in both  $R$ -space and  $k$ -space of (a) Bi@C NRs and (b)  $\text{Ce}_{0.05}\text{Bi}_{0.95}\text{@C}$  NRs, respectively; (c) Fitting results of EXAFS spectra to  $k$ -space.

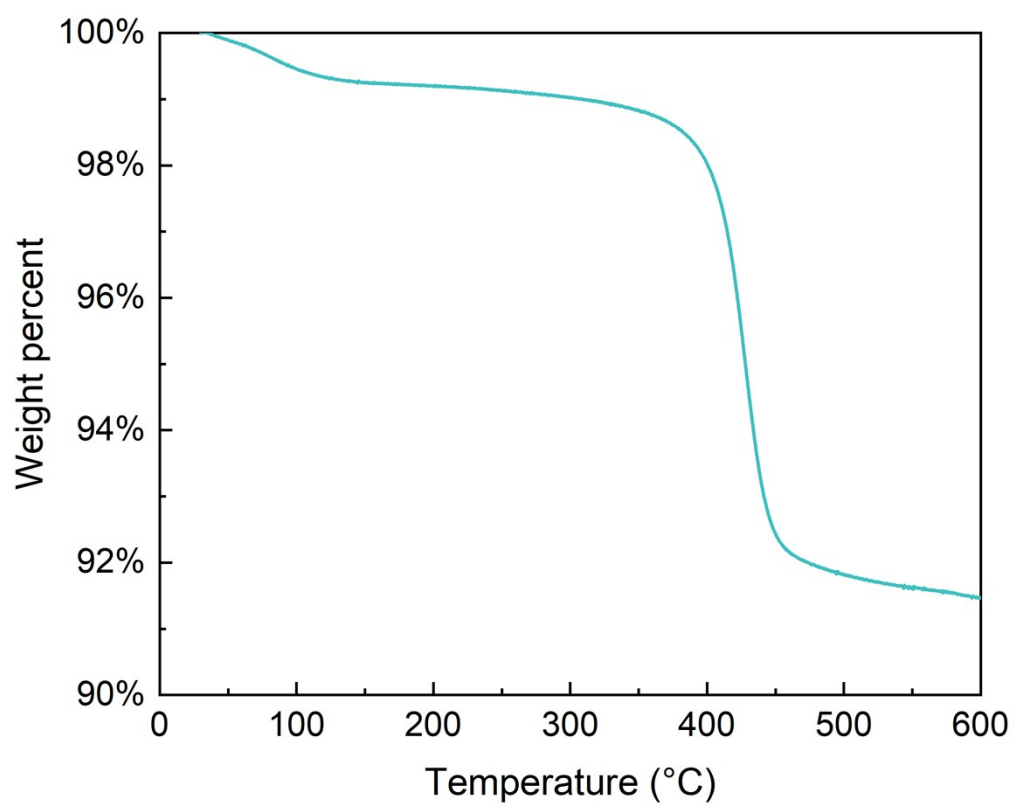

**Figure S18.** Thermogravimetric analysis of Ce<sub>0.05</sub>Bi<sub>0.95</sub>@C NRs.

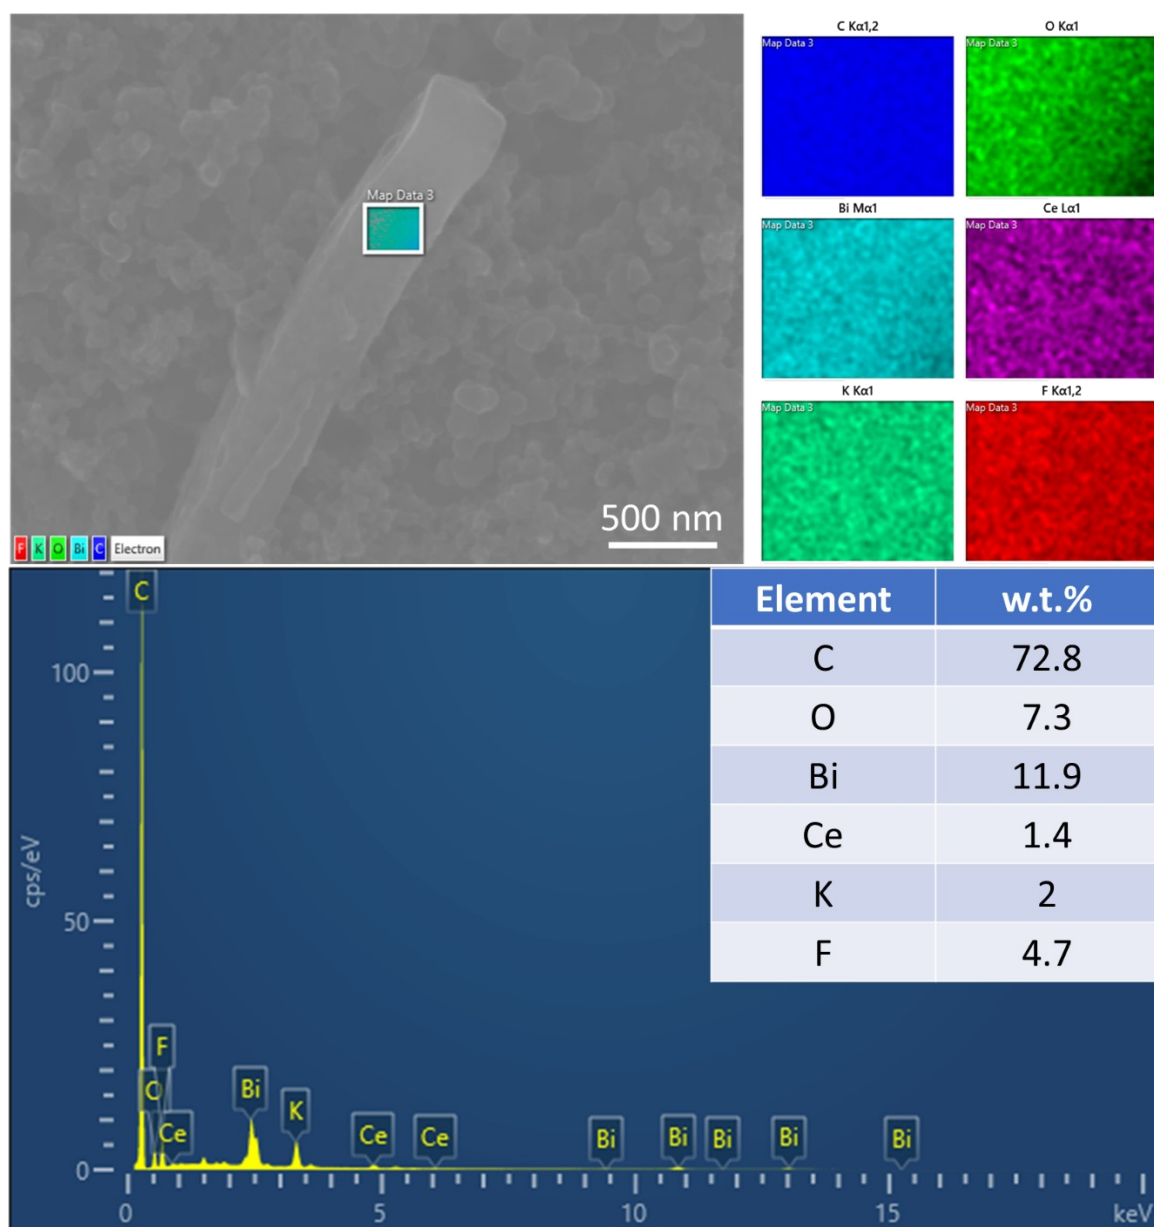

**Figure S19.** Elemental mapping of  $\text{Ce}_{0.05}\text{Bi}_{0.95}\text{@C}$  NRs after stability test.

**Table S1.** Peak fitting results of Raman spectrum of (a) Bi@C NRs; (b) Ce<sub>0.01</sub>Bi<sub>0.99</sub>@C NRs; (c) Ce<sub>0.05</sub>Bi<sub>0.95</sub>@C NRs; (d) Ce<sub>0.1</sub>Bi<sub>0.9</sub>@C NRs.

| Catalyst                                 | I <sub>D</sub> /I <sub>G</sub> |
|------------------------------------------|--------------------------------|
| Bi@C                                     | 2.237                          |
| Ce <sub>0.01</sub> Bi <sub>0.99</sub> @C | 2.446                          |
| Ce <sub>0.05</sub> Bi <sub>0.95</sub> @C | 2.670                          |
| Ce <sub>0.1</sub> Bi <sub>0.9</sub> @C   | 2.144                          |

**Table S2-1.** Summary of Bi-based catalysts for formate production in CO<sub>2</sub>RR (CO<sub>2</sub>-saturated 0.1 M KHCO<sub>3</sub>).

| <b>Catalyst</b>                             | <b>FE<sub>formate</sub></b> | <b>j<sub>formate</sub></b> | <b>Potential</b>           | <b>Stability</b> | <b>Potential window</b> |
|---------------------------------------------|-----------------------------|----------------------------|----------------------------|------------------|-------------------------|
| <b>Bi/Sn [2]</b>                            | 94.8%                       | 32 mA/cm <sup>2</sup>      | −1.0 V <sub>vs. RHE</sub>  | 20 hrs           | 200 mV                  |
| <b>Bi<sub>2</sub>O<sub>3</sub>@MCCM [3]</b> | 90%                         | 17.7 mA/cm <sup>2</sup>    | −1.36 V <sub>vs. RHE</sub> | 12 hrs           | 300 mV                  |
| <b>BiOx/C [4]</b>                           | 96%                         | 12.5 mA/cm <sup>2</sup>    | −1.37 V <sub>vs. RHE</sub> | 0.5 hrs          | 350 mV                  |
| <b>BiOBr [5]</b>                            | 95%                         | 60 mA/cm <sup>2</sup>      | −0.9 V <sub>vs. RHE</sub>  | 65 hrs           | 50 mV                   |
| <b>Bi-Sn aero gel [6]</b>                   | 93.9%                       | 9.3 mA/cm <sup>2</sup>     | −1.1 V <sub>vs. RHE</sub>  | 10 hrs           | 200 mV                  |
| <b>Bi NSs [7]</b>                           | 98%                         | 16 mA/cm <sup>2</sup>      | −0.9 V <sub>vs. RHE</sub>  | 100 hrs          | 400 mV                  |
| <b>Bi/Cu [8]</b>                            | 100%                        | 4 mA/cm <sup>2</sup>       | −1.5 V <sub>vs. RHE</sub>  | 24 hrs           | 520 mV                  |
| <b>Bi MSs [9]</b>                           | 96.2%                       | 15 mA/cm <sup>2</sup>      | −1.0 V <sub>vs. RHE</sub>  | 50 hrs           | 500 mV                  |
| <b>BOC [10]</b>                             | 92.6%                       | 35 mA/cm <sup>2</sup>      | −1.5 V <sub>vs. RHE</sub>  | 8 hrs            | 300 mV                  |
| <b>Bi NPs [11]</b>                          | 98%                         | 21.6 mA/cm <sup>2</sup>    | −1.5 V <sub>vs. RHE</sub>  | 20 hrs           | 500 mV                  |
| <b>Bi-Cu [12]</b>                           | 94.1%                       | 24.4 mA/cm <sup>2</sup>    | −1.0 V <sub>vs. RHE</sub>  | 20 hrs           | 500 mV                  |
| <b>Bi NTs [13]</b>                          | 97%                         | 39.4 mA/cm <sup>2</sup>    | −1.1 V <sub>vs. RHE</sub>  | 10 hrs           | 400 mV                  |
| <b>5% Ce-doped B@C</b>                      | 96.1%                       | 30.3 mA/cm <sup>2</sup>    | −1.5 V <sub>vs. RHE</sub>  | 40 hrs           | <b>1000 mV</b>          |

**Table S2-2.** Comparison of Highest FE<sub>formate</sub> with catalysts working in different conditions.

| <b>Catalyst</b>                                          | <b>Electrolyte</b>      | <b>Highest FE<sub>formate</sub></b> |
|----------------------------------------------------------|-------------------------|-------------------------------------|
| <b>5% Ce-doped B@C</b>                                   | 0.1 M KHCO <sub>3</sub> | 96.1%                               |
| <b>Bi<sub>2</sub>O<sub>3</sub>@GO [14]</b>               | 0.5 M KHCO <sub>3</sub> | 87.17%                              |
| <b>MnO<sub>2</sub>/g-C<sub>3</sub>N<sub>4</sub> [15]</b> | 0.5 M KHCO <sub>3</sub> | 68.65%                              |
| <b>ZnO/g-C<sub>3</sub>N<sub>4</sub> [16]</b>             | 0.5 M KHCO <sub>3</sub> | 87.17%                              |
| <b>γ-Al<sub>2</sub>O<sub>3</sub>@rGO [17]</b>            | 0.5 M KHCO <sub>3</sub> | 91.20%                              |

## References

1. Zheng, X., et al., *Sulfur-Modulated Tin Sites Enable Highly Selective Electrochemical Reduction of CO<sub>2</sub> to Formate*. *Joule*, 2017. **1**(4): p. 794-805.
2. Li, Z., et al., *Fabrication of Bi/Sn bimetallic electrode for high-performance electrochemical reduction of carbon dioxide to formate*. *Chemical Engineering Journal*, 2022. **428**.
3. Liu, S., et al., *Bi<sub>2</sub>O<sub>3</sub> Nanosheets Grown on Multi-Channel Carbon Matrix to Catalyze Efficient CO(2) Electroreduction to HCOOH*. *Angew Chem Int Ed Engl*, 2019. **58**(39): p. 13828-13833.
4. Lee, C.W., et al., *Selective Electrochemical Production of Formate from Carbon Dioxide with Bismuth-Based Catalysts in an Aqueous Electrolyte*. *ACS Catalysis*, 2018. **8**(2): p. 931-937.
5. Garcia de Arquer, F.P., et al., *2D Metal Oxyhalide-Derived Catalysts for Efficient CO<sub>2</sub> Electroreduction*. *Adv Mater*, 2018. **30**(38): p. e1802858.
6. Wu, Z., et al., *Engineering Bismuth-Tin Interface in Bimetallic Aerogel with a 3D Porous Structure for Highly Selective Electrocatalytic CO<sub>2</sub> Reduction to HCOOH*. *Angew Chem Int Ed Engl*, 2021. **60**(22): p. 12554-12559.
7. Zhao, M., et al., *Atom vacancies induced electron-rich surface of ultrathin Bi nanosheet for efficient electrochemical CO<sub>2</sub> reduction*. *Applied Catalysis B: Environmental*, 2020. **266**.
8. Jiang, H., et al., *High-selectivity electrochemical CO<sub>2</sub> reduction to formate at low overpotential over Bi catalyst with hexagonal sheet structure*. *Applied Surface Science*, 2021. **541**.
9. Zhang, Y., et al., *Mass-transfer-enhanced hydrophobic Bi microsheets for highly efficient electroreduction of CO<sub>2</sub> to pure formate in a wide potential window*. *Applied Catalysis B: Environmental*, 2023. **322**.
10. Wang, Y., et al., *Sub-2 nm ultra-thin Bi<sub>2</sub>O<sub>2</sub>CO<sub>3</sub> nanosheets with abundant Bi-O structures toward formic acid electrosynthesis over a wide potential window*. *Nano Research*, 2021. **15**(4): p. 2919-2927.
11. Ma, X., et al., *Polymeric carbon nitride supported Bi nanoparticles as highly efficient CO<sub>2</sub> reduction electrocatalyst in a wide potential range*. *J Colloid Interface Sci*, 2022. **608**(Pt 2): p. 1676-1684.
12. Wang, M., et al., *Synergistic Geometric and Electronic Effects in Bi–Cu Bimetallic Catalysts for CO<sub>2</sub> Electroreduction to Formate over a Wide Potential Window*. *ACS Sustainable Chemistry & Engineering*, 2022. **10**(17): p. 5693-5701.
13. Fan, K., et al., *Curved Surface Boosts Electrochemical CO<sub>2</sub> Reduction to Formate via Bismuth Nanotubes in a Wide Potential Window*. *ACS Catalysis*, 2019. **10**(1): p. 358-364.
14. Mulik, B., et al., *Bismuth-Oxide-Decorated Graphene Oxide Hybrids for Catalytic and Electrocatalytic Reduction of CO<sub>2</sub>*. *Chemistry—A European Journal*, 2020. **26**(40): p. 8801-8809.
15. Mulik, B., et al., *Highly efficient manganese oxide decorated graphitic carbon nitride electrocatalyst for reduction of CO<sub>2</sub> to formate*. *Catalysis Today*, 2021. **370**(1): p. 104-113.
16. Mulik, B., et al., *Electrocatalytic and catalytic CO<sub>2</sub> hydrogenation on ZnO/g-C<sub>3</sub>N<sub>4</sub> hybrid nanoelectrodes*. *Applied Surface Science*, 2021. **538**: p. 148120.
17. Mulik, B., et al., *Facile synthesis and characterization of  $\gamma$ -Al<sub>2</sub>O<sub>3</sub> loaded on reduced graphene oxide forelectrochemical reduction of CO<sub>2</sub>*. *Sustainable Energy & Fuels*, 2022. **6**: p. 5308.
